# Supplementary material for: Assessing the Presence of Wuchereria bancrofti Infections in Vectors Using Xenomonitoring in Lymphatic Filariasis Endemic Districts in Ghana
Source: PubMed Central journal article supplement (PMC6473662; doi:10.3390/tropicalmed4010049), 2019-03-17
Supplement: tropicalmed-04-00049-s001.pdf [file tropicalmed-04-00049-s001.pdf]

Delta Rn vs Cycle

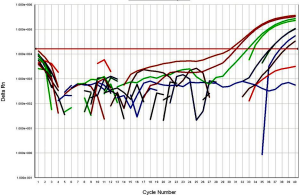

Selected Detector: All  
Path: 01-010C1-08  
Invent: 784, 1.500 (Grand Core)
